# Supplementary material
Source: publisher figshare collection journal article supplement (https://acs.figshare.com/ndownloader/files/26750517)
Supplement: Supplementary file 1 [file 26750517]

## **Supporting Information**

### **Heterovalent Substitution in Mixed Halide Perovskite Quantum Dots for Improved and Stable Photovoltaic Performance**

Dibyendu Ghosh,<sup>#</sup> Md. Yusuf Ali,<sup>#</sup> Anima Ghosh, Arnab Mandal and Sayan Bhattacharyya\*

*Department of Chemical Sciences, and Centre for Advanced Functional Materials, Indian Institute of Science Education and Research (IISER) Kolkata, Mohanpur - 741246, India*

\*Email for correspondence: sayanb@iiserkol.ac.in

<sup>#</sup>Equal contribution

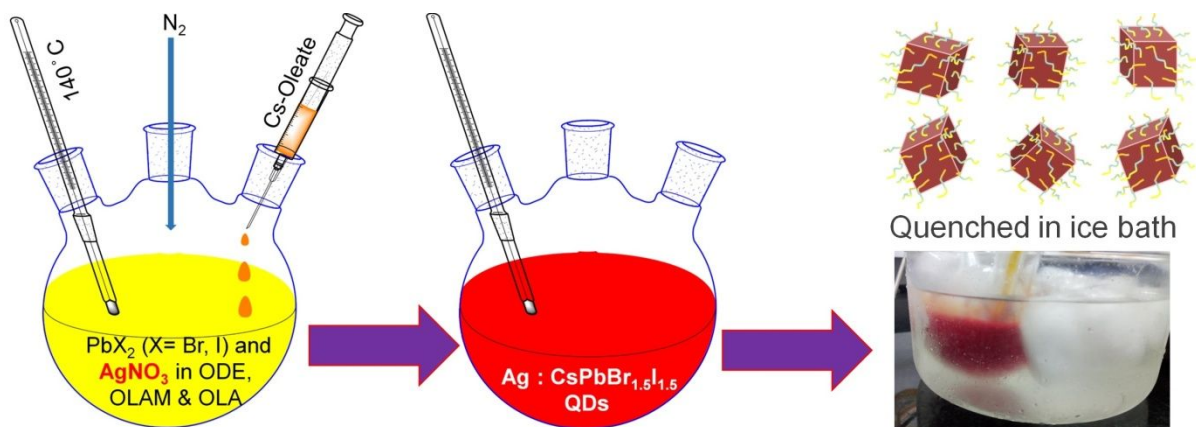

**Figure S1.** Schematic representation of the synthesis of  $\text{CsPb}_{1-x}\text{Ag}_x\text{I}_{1.5}\text{Br}_{1.5}$  QDs *via* hot injection method.

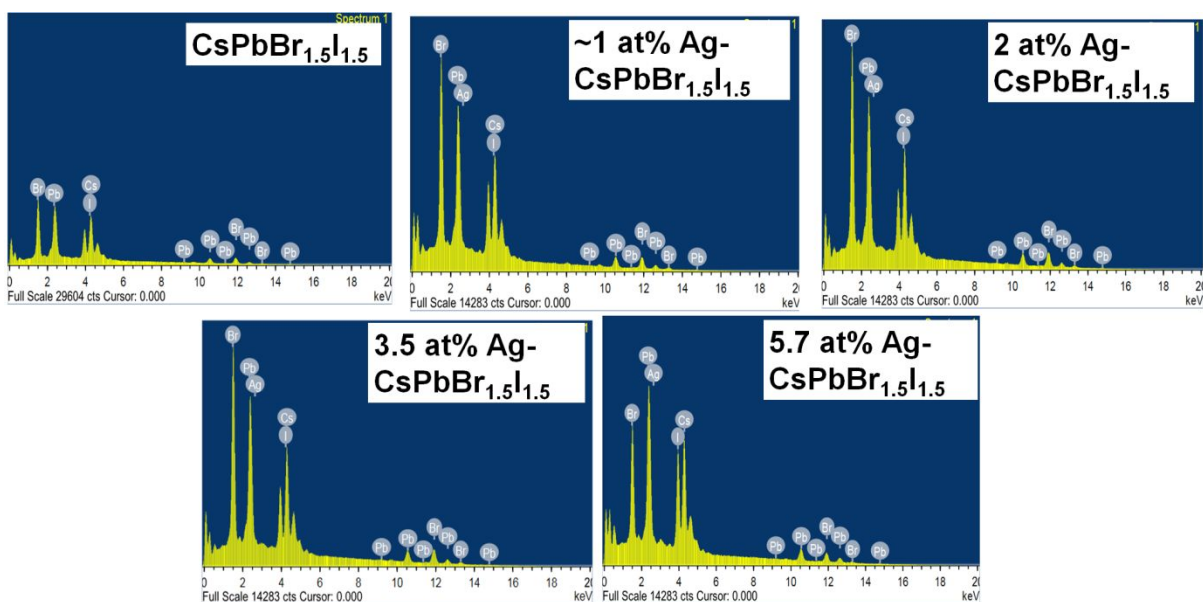

**Figure S2.** EDAX spectra of pristine and Ag-doped CPBI QDs.

**Table S1.** EDAX data of the individual elements in Ag loaded CBPI QDs.

| Sample                    | Cs<br>at% | Pb<br>at% | Br<br>at% | I<br>at% | Ag<br>at% | $x$ in<br>$\text{CsPb}_{1-x}\text{Ag}_x\text{Br}_{1.5}\text{I}_{1.5}$ | $d$ spacing<br>in Å<br>(XRD) | QD size<br>(nm)* |
|---------------------------|-----------|-----------|-----------|----------|-----------|-----------------------------------------------------------------------|------------------------------|------------------|
| CPBI                      | 20.4      | 20.1      | 29.6      | 29.9     | 0         | 0                                                                     | 4.2573                       | $8.4 \pm 0.5$    |
| $\text{Ag}_{0.01}$ -CPBI  | 20.5      | 19.8      | 30.1      | 29.75    | 0.15      | 0.01 (1 %)                                                            | 4.2213                       | $8.3 \pm 0.3$    |
| $\text{Ag}_{0.02}$ -CPBI  | 20.3      | 19.5      | 30.3      | 29.5     | 0.4       | 0.02 (2%)                                                             | 4.1937                       | $8.3 \pm 0.6$    |
| $\text{Ag}_{0.035}$ -CPBI | 20.4      | 19.2      | 30.4      | 29.3     | 0.7       | 0.035 (3.5%)                                                          | 4.1858                       | $8.1 \pm 0.4$    |
| $\text{Ag}_{0.057}$ -CPBI | 20.2      | 18.5      | 29.8      | 30.4     | 1.1       | 0.057 (5.7%)                                                          | 4.1937                       | $8.3 \pm 0.5$    |

\*Error is estimated for 10 samples

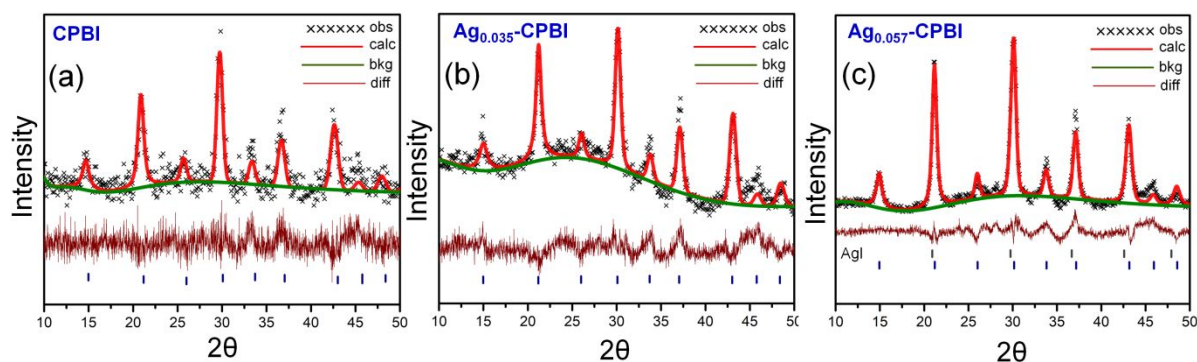

**Figure S3.** Rietveld refinement of XRD patterns of (a) CPBI, (b)  $\text{Ag}_{0.035}\text{-CPBI}$  and (c)  $\text{Ag}_{0.057}\text{-CPBI}$  QDs.

**Table S2.** Rietveld refinement results.

| QD                              | Major Phases                                              | Space Group | Volume ( $\text{\AA}^3$ ) | Lattice parameter ( $\text{\AA}$ ) | GOF  | $R_{wp}$ |
|---------------------------------|-----------------------------------------------------------|-------------|---------------------------|------------------------------------|------|----------|
| CPBI                            | $\text{CsPbBr}_{1.5}\text{I}_{1.5}$                       | $Pm-3m$     | 212.028<br>$\pm 1.383$    | $5.963 \pm 0.013$                  | 1.03 | 14.0*    |
| $\text{Ag}_{0.035}\text{-CPBI}$ | $\text{CsPbBr}_{1.5}\text{I}_{1.5}$                       | $Pm-3m$     | 211.389<br>$\pm 0.312$    | $5.957 \pm 0.003$                  | 1.33 | 5.8      |
| $\text{Ag}_{0.057}\text{-CPBI}$ | $\text{CsPbBr}_{1.5}\text{I}_{1.5}$ (97.5%)<br>AgI (2.5%) | $Pm-3m$     | 207.579<br>$\pm 1.741$    | $5.921 \pm 0.016$                  | 1.58 | 6.3      |

\*The  $R_{wp}$  is high because of the scattered experimental data points in Figure S3a.

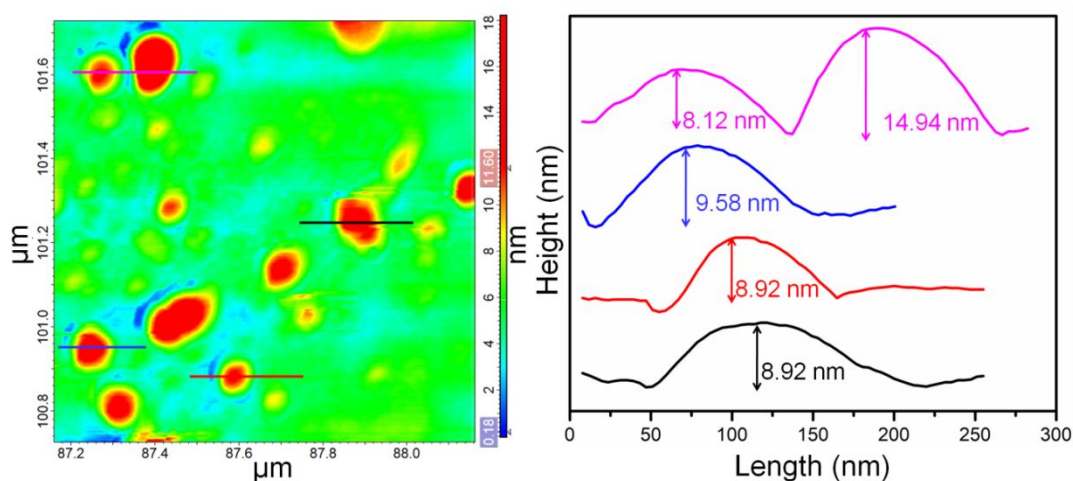

**Figure S4.** AFM image of  $\text{Ag}_{0.035}\text{-CPBI}$  after 2 weeks of ageing (left panel) and its line profile (right panel).

**Table S3.** Transient PL parameters of pristine and Ag-doped CPBI QDs.

| Sample                    | PLQY (%) | B <sub>1</sub> | $\tau_1$ (ns) | B <sub>2</sub> | $\tau_2$ (ns) | B <sub>3</sub> | $\tau_3$ (ns) | $\chi^2$ | $\langle \tau \rangle$ (ns)* |
|---------------------------|----------|----------------|---------------|----------------|---------------|----------------|---------------|----------|------------------------------|
| CPBI                      | 72       | 34.72          | 2.95          | 46.23          | 12.2          | 19.05          | 0.66          | 1.07     | 10.60 ± 0.03                 |
| Ag <sub>0.01</sub> -CPBI  | 74       | 30.60          | 3.49          | 56.68          | 13.4          | 12.72          | 0.79          | 1.04     | 12.04 ± 0.08                 |
| Ag <sub>0.02</sub> -CPBI  | 75       | 27.85          | 3.14          | 57.00          | 14.4          | 15.15          | 0.68          | 1.19     | 13.17 ± 0.12                 |
| Ag <sub>0.035</sub> -CPBI | 78       | 18.32          | 3.84          | 73.91          | 17.7          | 7.71           | 0.72          | 1.08     | 16.92 ± 0.06                 |
| Ag <sub>0.057</sub> -CPBI | 73       | 41.65          | 2.14          | 25.16          | 7.8           | 33.19          | 0.53          | 1.04     | 5.07 ± 0.14                  |

\*Error is estimated on 5 samples.

$\tau$ : lifetime, B: corresponding amplitude,  $\langle \tau \rangle$  : average lifetime,  $\langle \tau \rangle = \frac{\sum_{t=1}^3 B * \tau^2}{\sum_{t=1}^3 B * \tau}$

### Measurement of PL Quantum Yield (PLQY):

To measure PLQY the samples were dispersed in hexane and with the help of standard dye, according to the following formula:<sup>S1,S2</sup>

$$(QY)_S = (QY)_R \frac{\eta_S^2 \frac{1}{A} A_S}{\eta_R^2 \frac{1}{A} I_R}$$

Here,

(QY)<sub>S</sub> = Quantum Yield of sample

(QY)<sub>R</sub> = Quantum Yield of reference

$\eta_S$  = Refractive Index of the sample

$\eta_R$  = Refractive Index of the reference

$I_R$  = Integrated fluorescence Intensity of the reference

$I_S$  = Integrated fluorescence Intensity of the sample

$A_R$  = the absorbance of the reference at the excitation wavelength

$A_S$  = the absorbance of the sample at the excitation wavelength

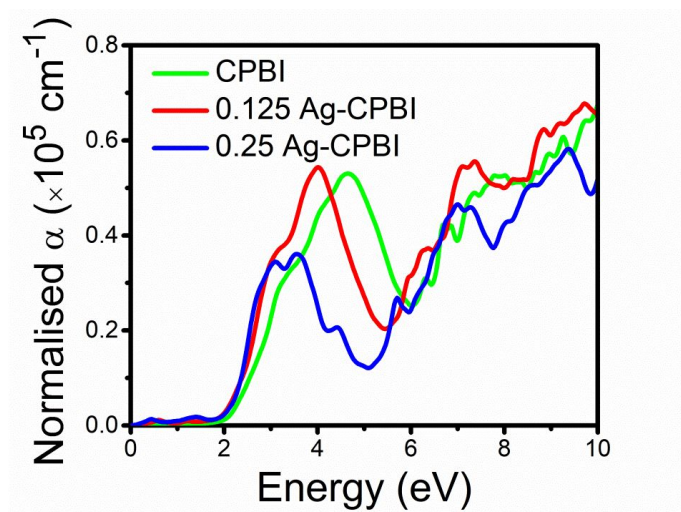

**Figure S5.** Calculated absorption coefficient ( $\alpha$ ) plots of  $\text{CsPb}_{1-x}\text{Ag}_x\text{I}_{1.5}\text{Br}_{1.5}$  ( $x = 0, 0.125, 0.25$ ) structures.

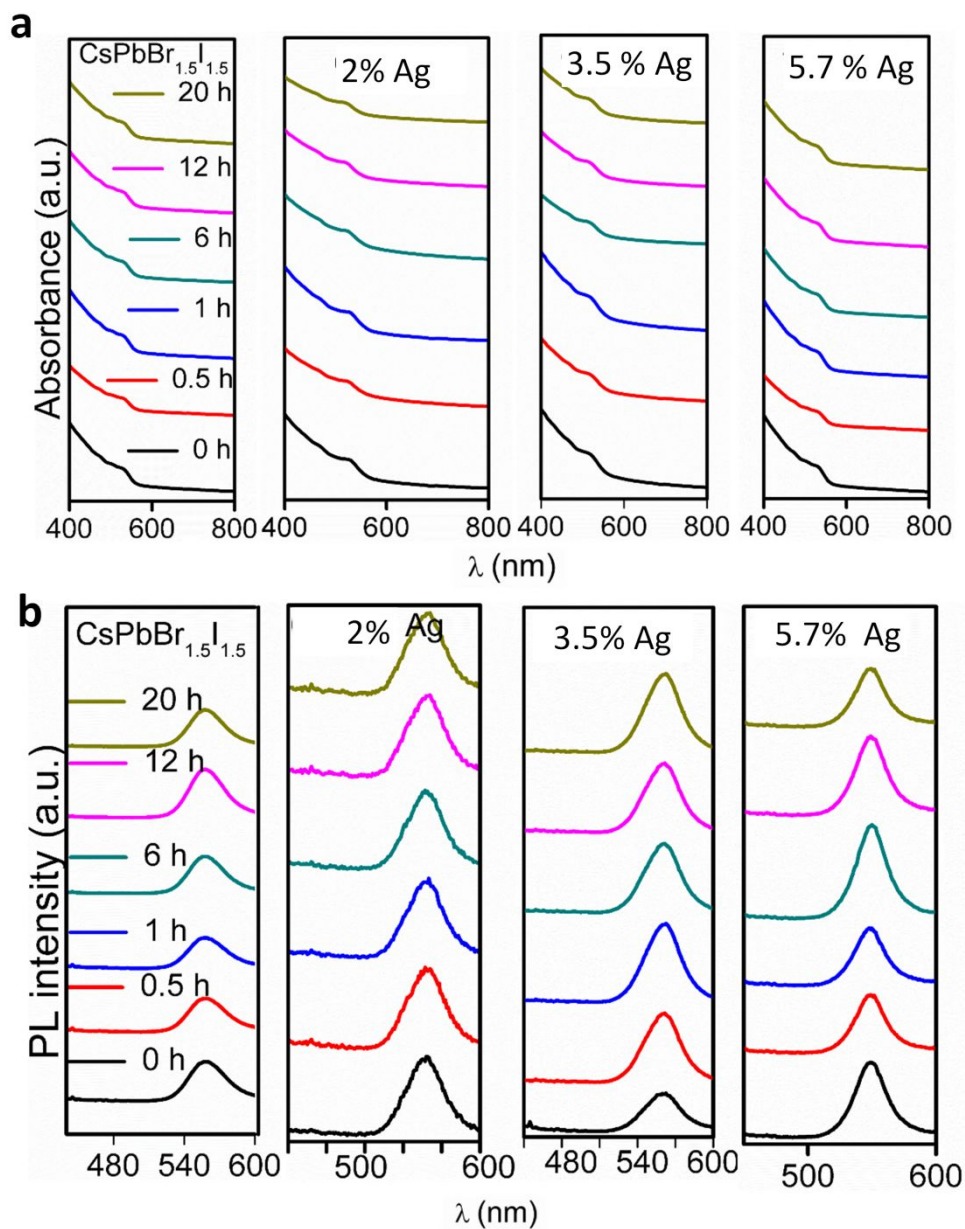

**Figure S6.** Stability test of pristine and Ag-doped CPBI QDs with respect to (a) optical absorbance and (b) PL intensity. The QD solutions were monitored in 20h continuous measurement under ambient conditions.

## References

(S1) Brouwer, A. M. Standards for Photoluminescence Quantum Yield Measurements in Solution (IUPAC Technical Report), *Pure Appl. Chem.* **2011**, 83, 2213–2228.

(S2) Su, Y.; Chen, X.; Ji, W.; Zeng, Q.; Ren, Z.; Su, Z.; Liu, L. Highly Controllable and Efficient Synthesis of Mixed-Halide CsPbX<sub>3</sub> (X = Cl, Br, I) Perovskite QDs toward the Tunability of Entire Visible Light, *ACS Appl. Mater. Interfaces* **2017**, *9*, 33020–33028.
